# Supplementary material for: Measurement of the surface hydrophobicity of engineered nanoparticles using an atomic force microscope
Source: Royal Society of Chemistry journal article supplement (doi:10.1039/c8cp04676j), 2018-01-01
Supplement: c8cp04676j1.pdf [file c8cp04676j1.pdf]

1  
2  
3  
4  
5  
6  
7  
8  
9  
10  
11  
12

**Supplementary Information**

For

**Measurement of Surface Hydrophobicity of Engineered Nanoparticles using Atomic  
Force Microscope**

Wanyi Fu and Wen Zhang\*

Department of Civil and Environmental Engineering, New Jersey Institute of Technology,  
Newark, New Jersey 07102, United States

\*Corresponding author: 323 Martin Luther King Blvd., Newark, NJ 07102; Phone: (973)  
596-5520; Fax: (973) 596-5790; Email: [wen.zhang@njit.edu](mailto:wen.zhang@njit.edu)

13 **S1. Properties of nanoparticles (NPs), cantilevers and substrates**

14 **Figures S1a~g** show TEM morphology images of TiO<sub>2</sub>, ZnO, SiO<sub>2</sub>, CuO, CeO<sub>2</sub>,  
 15 hematite ( $\alpha$ -Fe<sub>2</sub>O<sub>3</sub>), and Ag NPs used in this study, and they are close to spherical shape  
 16 with diameters of 25.0±5.9, 52.0±9.1, 33.2±0.8, 42.1±1.8, 20.0±3.0, 53.0±6.0, and  
 17 80.0±0.7 nm, respectively, which were consistent with the manufacturer-reported values.  
 18 **Figure S1h~m** provide the particle size distribution histograms computed from TEM  
 19 images via the image processing and analysis program ImageJ. TiO<sub>2</sub>, ZnO and Ag NPs had  
 20 relatively broad size distribution, while SiO<sub>2</sub>,  $\alpha$ -Fe<sub>2</sub>O<sub>3</sub> and CuO NPs had much narrower  
 21 size distribution.

22 **Table S1.** List of the NPs used in this study.

| NPs                            | Average particle diameter (nm) | pH of the suspension | Crystal type     | Vendor                               |
|--------------------------------|--------------------------------|----------------------|------------------|--------------------------------------|
| Fe <sub>2</sub> O <sub>3</sub> | 49                             | 4.0                  | Alpha (hematite) | Lab-synthesized <sup>1</sup>         |
| TiO <sub>2</sub>               | 25                             | 6.9                  | Anatase          | Aldrich                              |
| CeO <sub>2</sub>               | 25                             | 4.5                  | Cubic (fluorite) | Aldrich                              |
| ZnO                            | 50                             | 6.8                  | --               | Aldrich                              |
| SiO <sub>2</sub>               | 33                             | 5.9                  |                  | Aldrich                              |
| CuO                            | 42                             | 7.0                  | Gamma and alpha  | Nanostructured & Amorphous Materials |
| Ag with citrate coating        | 80                             | 5.0                  | Cubic            | Ted Pella                            |

24 **Table S2.** Summary of the cantilever tip properties.

| Cantilever type                                             | Surface functionalization             | Radius of curvature ( $R_C$ ) of the tip (nm) | Spring constant (N/m) <sup>c</sup> | Frequency (kHz) | Water contact angle (°) |
|-------------------------------------------------------------|---------------------------------------|-----------------------------------------------|------------------------------------|-----------------|-------------------------|
| Gold-coated Si <sub>3</sub> N <sub>4</sub> tip <sup>a</sup> | CH <sub>3</sub> -terminated end group | 42±12                                         | 0.06±0.03                          | 17±4            | 105                     |
| Gold-coated Si <sub>3</sub> N <sub>4</sub> tip <sup>a</sup> | None                                  | 42±12                                         | 0.06±0.03                          | 17±4            | 0                       |
| Si <sub>3</sub> N <sub>4</sub> tip <sup>b</sup>             | None                                  | 20±5                                          | 0.07±0.05                          | 22±7            | 15                      |

25 <sup>a,b</sup> more information is available at <http://www.asylumresearch.com/Probe/RC800PB>, Olympus and  
 26 <http://www.brukerafmprobes.com/p-3444-mlct.aspx>. <sup>c</sup> spring constants ( $K_{sp}$ ) were determined by the Agilent  
 27 Thermal K tuning modulus (see Agilent 5500 User's Guide for details).<sup>2</sup>

28  
 29

30

**Table S3.** Water contact angles for various NP surfaces.

| NPs                            | Contact angles (°) | Typical photos of the water droplet                                                |
|--------------------------------|--------------------|------------------------------------------------------------------------------------|
| Fe <sub>2</sub> O <sub>3</sub> | 16.5 ± 0.6         |  |
| TiO <sub>2</sub>               | 7.5 ± 4.3          |  |
| CeO <sub>2</sub>               | 49.5 ± 0.5         |   |
| ZnO                            | 69.0 ± 0.4         |   |
| SiO <sub>2</sub>               | 63.4 ± 9.5         |   |
| CuO                            | 41.0 ± 0.6         |  |
| Ag                             | 72 ± 3.2           |   |

31

32 **Table S4.** Water contact angles for various substrate surfaces.

| Gold surfaces<br>coated with CH <sub>3</sub> | Molar fractions of CH <sub>3</sub> |                          |                          |                                               |       |
|----------------------------------------------|------------------------------------|--------------------------|--------------------------|-----------------------------------------------|-------|
|                                              | 0%                                 | 25%                      | 50%                      | 75%                                           | 100%  |
| Contact angle (°)                            | 30±1                               | 60±2                     | 82±2                     | 100±3                                         | 105±5 |
| SAMs                                         | PEG-coated<br>surface              | Silane-coated<br>surface | Biotin-coated<br>surface | Biotin and streptavidin<br>conjugated surface |       |
| Contact angle (°)                            | 10±2                               | 96±2                     | 18±3                     | 23±1                                          |       |

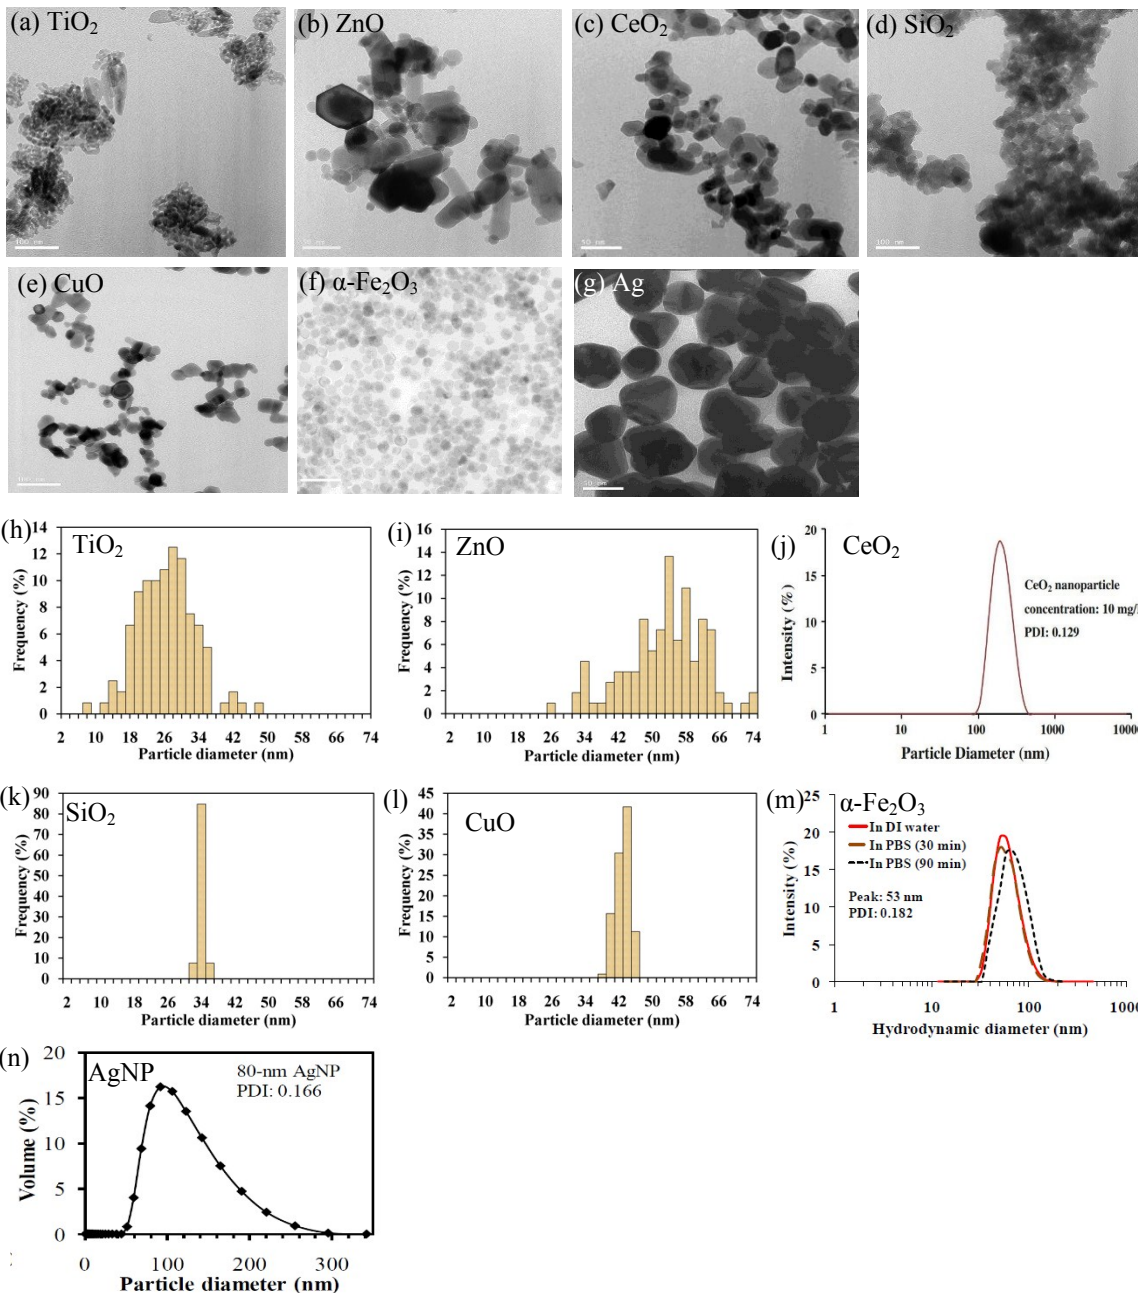

33 **Figure S1.** (a~g) TEM images of TiO<sub>2</sub>, ZnO, CeO<sub>2</sub>, SiO<sub>2</sub>, CuO, hematite (α-Fe<sub>2</sub>O<sub>3</sub>), and  
 34 AgNPs, on a carbon-coated grid. All the white bars on the bottom left equals 100 nm,  
 35 except the one in (b-c, g) that equals 50 nm. (h~n) Particle diameter distribution histograms.  
 36

37

## 38 S2. Adhesion force measurement with AFM

39 An Agilent 5500 AFM (Molecular Imaging) was used for the adhesion force  
40 measurement in contact mode. Before operating the AFM, the resonance frequency and  
41 spring constant of the cantilever tips were tuned and determined. The cantilever tip used in  
42 our experiments had the nominal spring constant ( $K_{sp}$ ) of  $0.11 \pm 0.03$  N/m and the actual  
43 constant was determined by Agilent Thermal K tuning modulus (see Agilent 5500 User's  
44 Guide for details).<sup>2</sup> The nominal resonance frequency was  $17 \pm 13$  Hz and the actual  
45 resonance frequency was determined for each new cantilever probe by sweeping the drive  
46 signal through a range of frequencies about the nominal resonance frequency. The drive  
47 frequency was set 0.1 kHz off the resonance frequency.<sup>3</sup>

48 For the adhesion force measurements, the loading force applied to the NP surface was  
49 fixed at *ca.* 6 nN by setting the maximum deflection of the cantilever at 100 nm. The initial  
50 deflection was set at  $-1.2 \pm 0.1$  V with a setpoint of 0 V, allowing a slight contact between  
51 the tip and the sample before the approaching stopped. Each cycle of force measurement  
52 includes approach, contact, and retraction as shown in **Figure S2a**. Briefly, NPs  
53 immobilized on the silicon wafer seated on a piezo scanner approach the cantilever and  
54 stop when the cantilever probe contacts the NPs with a slight compression force as  
55 specified above. As a result, the cantilever slightly bends up and the reflected laser reaches  
56 the setpoint (0 V). After the cantilever further compresses the tip against NPs for 100 nm,  
57 the cantilever begins to lift up and due to the adhesion force between the tip and the NPs  
58 the cantilever will be dragged by the piezo scanner for a certain distance, which is the  
59 recorded as the maximum deflection and converted to the cantilever displacement ( $d$ ). After  
60 each cycle, a force-distance curve containing 500 datapoints was generated in **Figure S2b**

61 and adhesion force (nN or pN) was obtained according to Hooke's law:  $F_{ad} = K_{sp}d$ , where  
 62  $d$  is the deflection displacement of the cantilever (nm). The deflection displacement relative  
 63 to the baseline (no deflection of the cantilever), where the tip is no longer in contact with  
 64 the sample surface, was read in deflection amplitude (V). The deflection amplitude (V) was  
 65 converted to the deflection displacement (nm) also based on the Thermal K tuning  
 66 modulus. A typical histogram of adhesion force distribution was generated for each sample  
 67 surface as shown in **Figure S2c**.

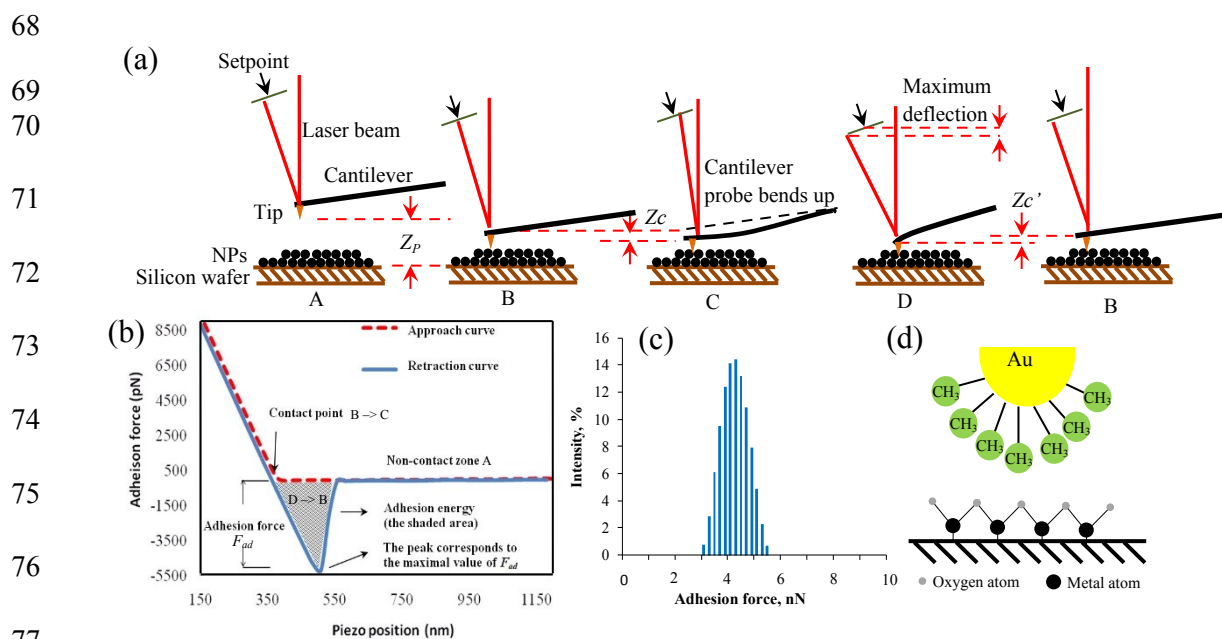

78 **Figure S2.** (a) Schematics of a complete cycle of force measurement with AFM (in order  
 79 of A-B-C-D-B-A).  $Z_p$  is the initial displacement of piezo scanner away from the tip and the  
 80 NPs (black dots) were immobilized on the silicon wafer substrate;  $Z_c$  is the bending distance  
 81 of the cantilever probe when compressed against the NPs;  $Z_c'$  is the deflection displacement  
 82 of the cantilever when pulled up away from the contact; (b) A typical force-distance curve  
 83 generated by AFM; (c) A histogram of adhesion force distribution; (d) The interaction  
 84 between the chemical modified gold tip (functionalized with a hydrophobic -CH<sub>3</sub>) and a  
 85 typical atomic structure of metal oxide NPs.

86

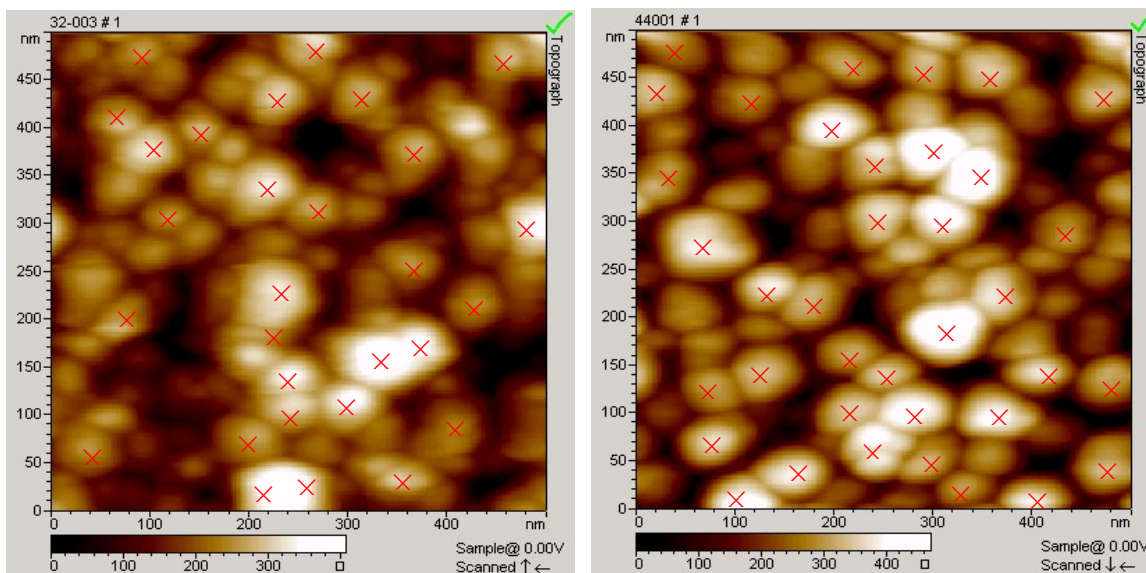

87

88 **Figure S3.** Adhesion force curve collection positions (red crosses) on the AFM height  
 89 image (500 nm × 500 nm). The samples are CeO<sub>2</sub> NPs deposited on silica wafer.

90

91 **S3. Quality Assurance (QA)/Quality Check (QC) for adhesion force measurements**

92 To verify the coating integrity of the functionalized tips during the force measurement,  
 93 adhesion force measurements are carried out on the gold substrate surface functionalized  
 94 with 100% CH<sub>3</sub>- group after 20-30 force measurements on sample surfaces. The measured  
 95 adhesion force values should have variations of less than 10% of that obtained with the  
 96 newly prepared tips. Otherwise, the cantilever tip would be changed. Duplicate values are  
 97 taken for each measurement point and the variation should be within 5% of the average.  
 98 To avoid the artifacts from the tip engagement on silica substrate without nanomaterial  
 99 deposition, the topographical images of nanomaterials were first obtained (e.g., **Figure S3**)  
 100 and then, the adhesion force measurements were conducted only on the nanomaterial  
 101 surfaces, which can be visualized and located from the topographical images.

102 **References**

- 103 1. W. Zhang, A. G. Stack and Y. Chen, *Colloids Surf., B*, 2010, **82**, 316-324  
104 2. N. A. Burnham, X. Chen, C. S. Hodges, G. A. Matei, E. J. Thoreson, C. J. Roberts, M. C. Davies  
105 and S. J. B. Tandler, *Nanotechnol.*, 2003, **14**, 1-6.  
106 3. E. Balnois, K. J. Wilkinson, J. R. Lead and J. Buffle, *Environ. Sci. Technol.*, 1999, **33**, 3911-  
107 3917.

108
